# Supplementary material for: Positive Feedback Loop of SNAIL-IL-6 Mediates Myofibroblastic Differentiation Activity in Precancerous Oral Submucous Fibrosis
Source: MDPI journal article supplement (doi:10.3390/cancers12061611), 2020-06-18

Supplementary Materials

# Positive Feedback Loop of SNAIL-IL-6 Mediates Myofibroblastic Differentiation Activity in Precancerous Oral Submucous Fibrosis

Chih-Yu Peng, Yi-Wen Liao, Ming-Yi Lu, Chieh-Mei Yang, Pei-Ling Hsieh and Cheng-Chia Yu

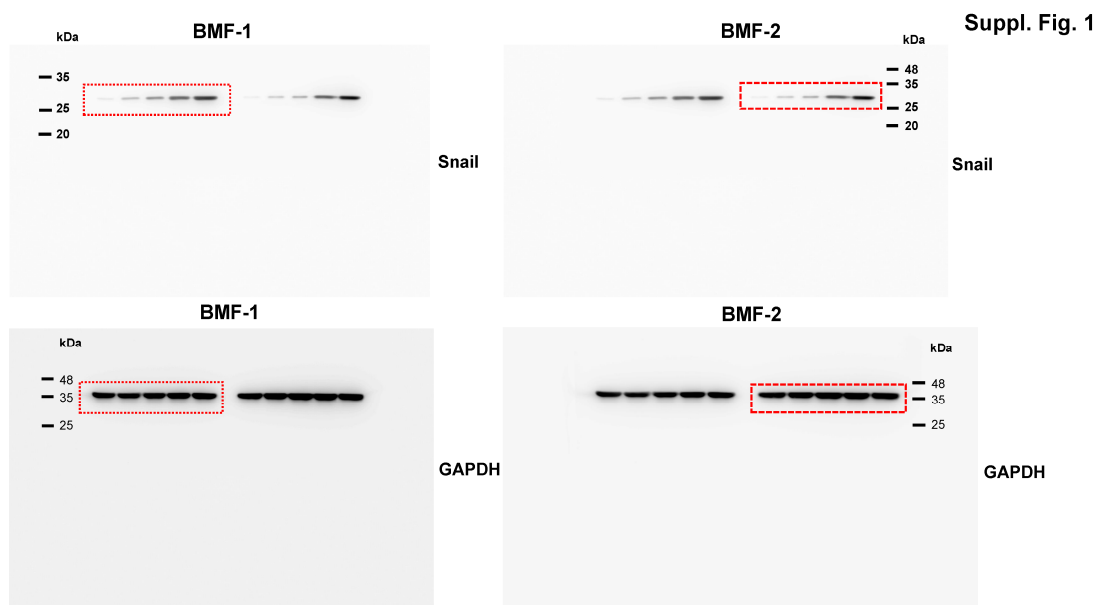

Figure S1. Original immunoblotting data for Figure 1E.

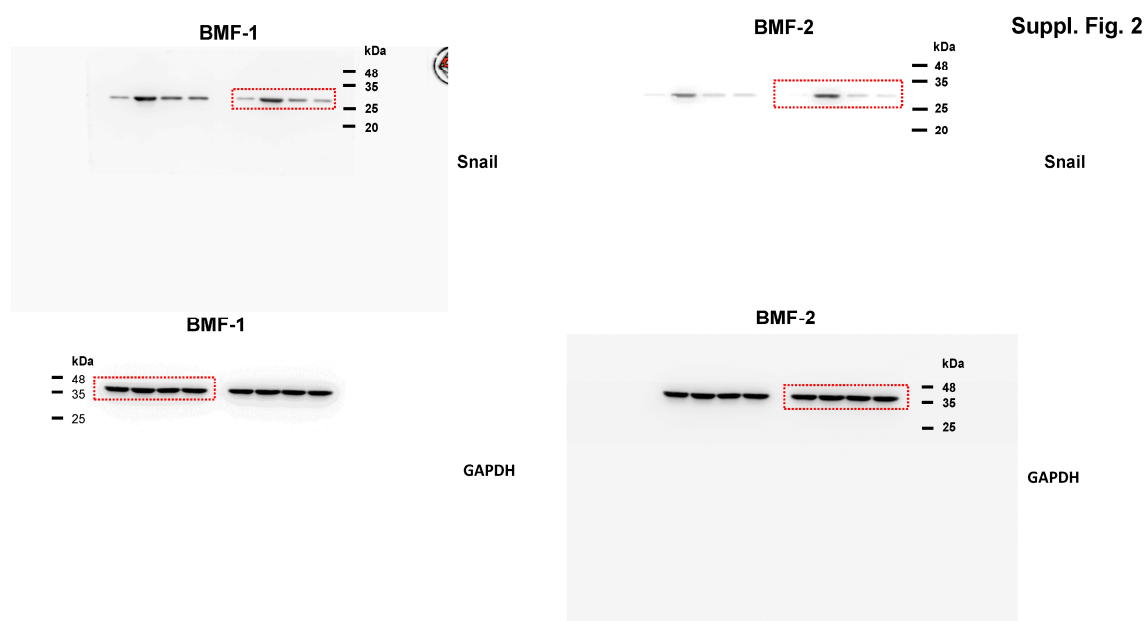

Figure S2. Original immunoblotting data for Figure 2B.

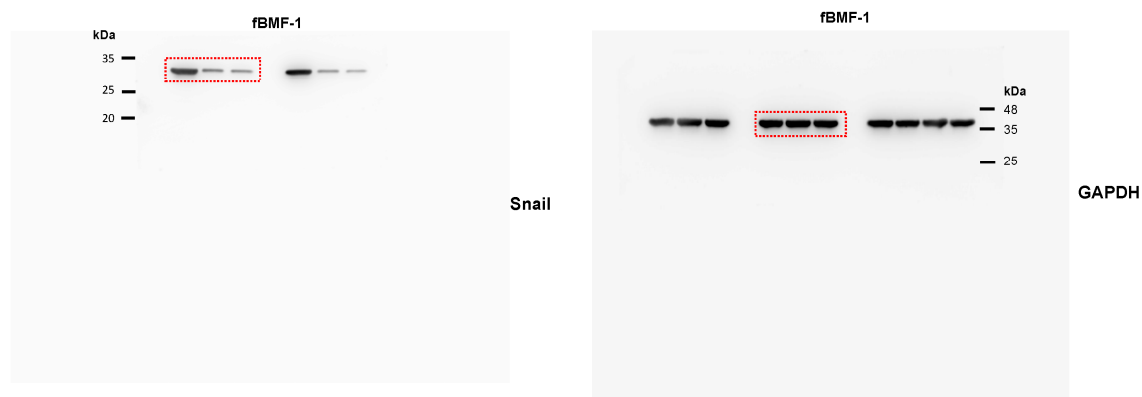

**Figure S3.** Original immunoblotting data for Figure 3A.

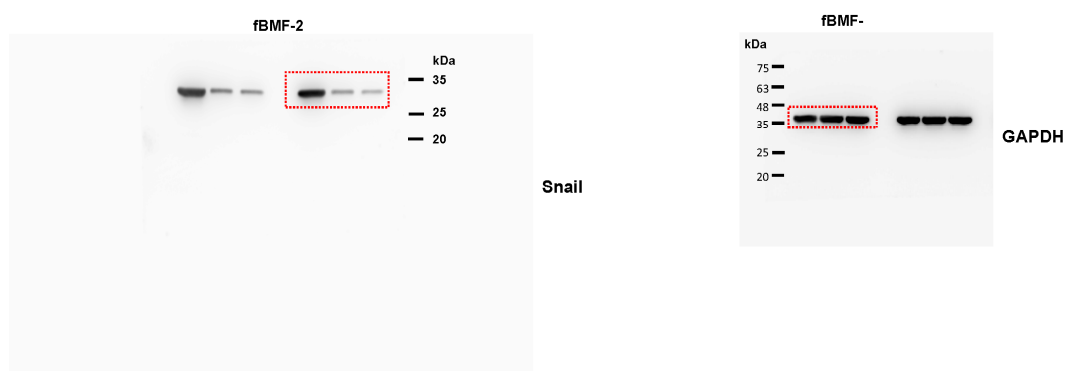

**Figure S4.** Original immunoblotting data for Figure 3A.

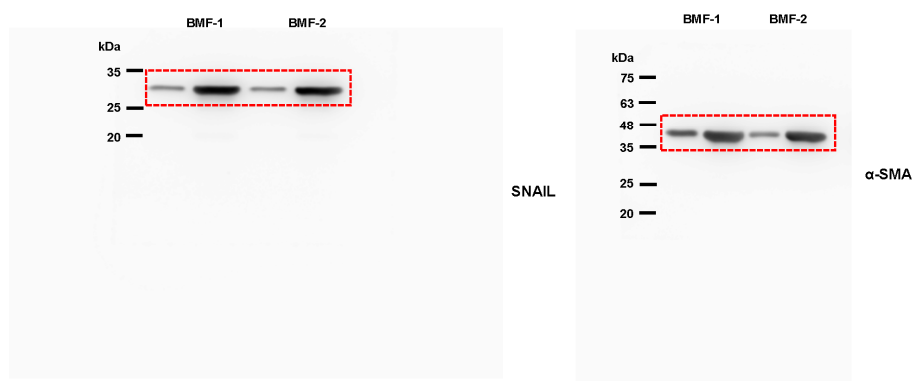

**Figure S5.** Original immunoblotting data for Figure 4A.

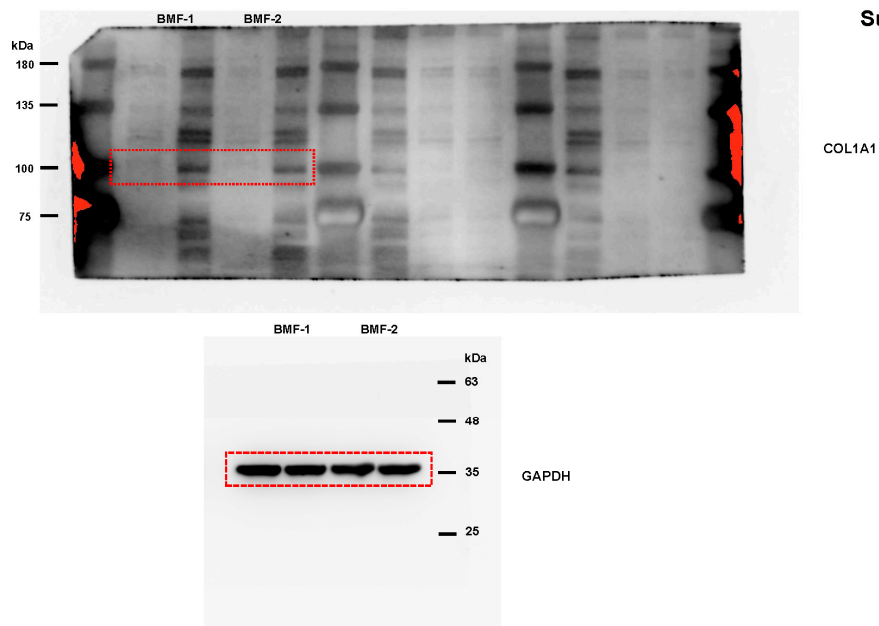

Figure S6. Original immunoblotting data for Figure 4A.

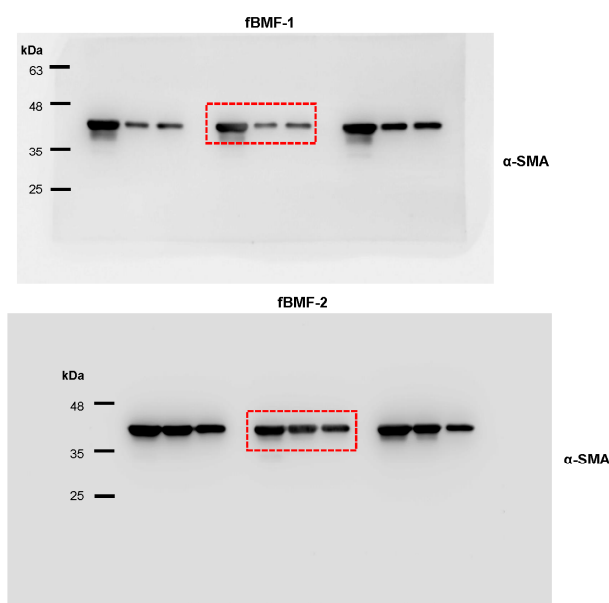

Figure S7. Original immunoblotting data for Figure 5B.

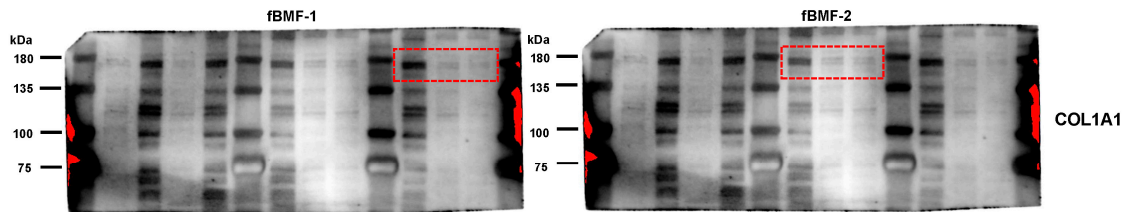

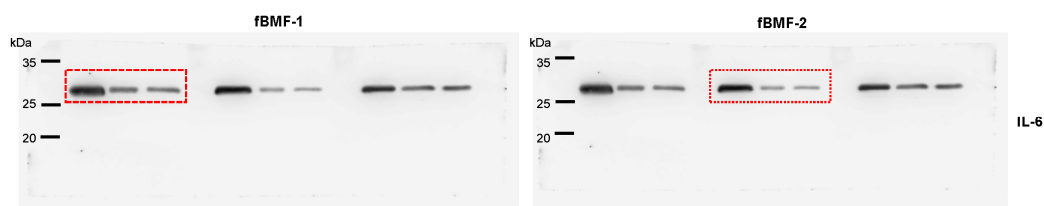

**Figure S9.** Original immunoblotting data for Figure 5B.

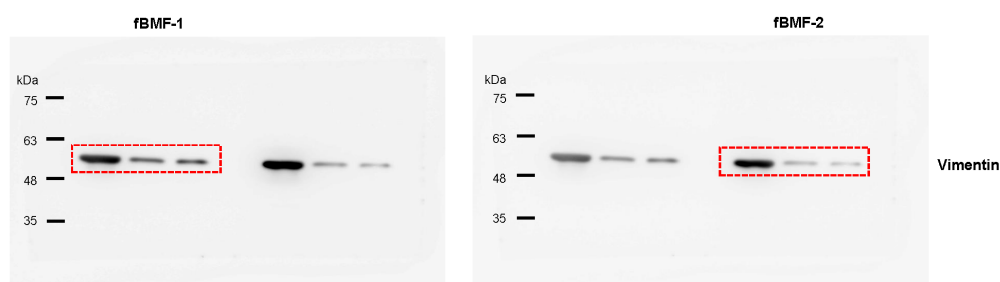

**Figure S10.** Original immunoblotting data for Figure 5B.

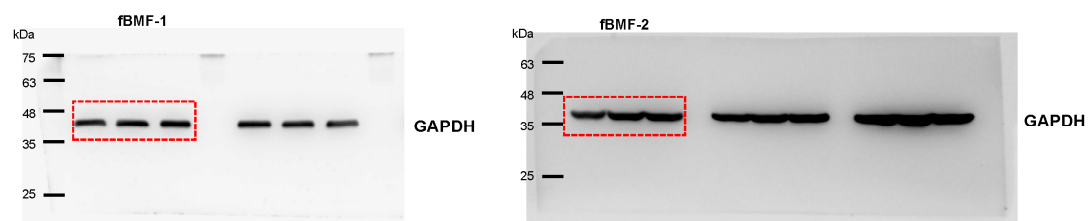

**Figure S11.** Original immunoblotting data for Figure 5B.

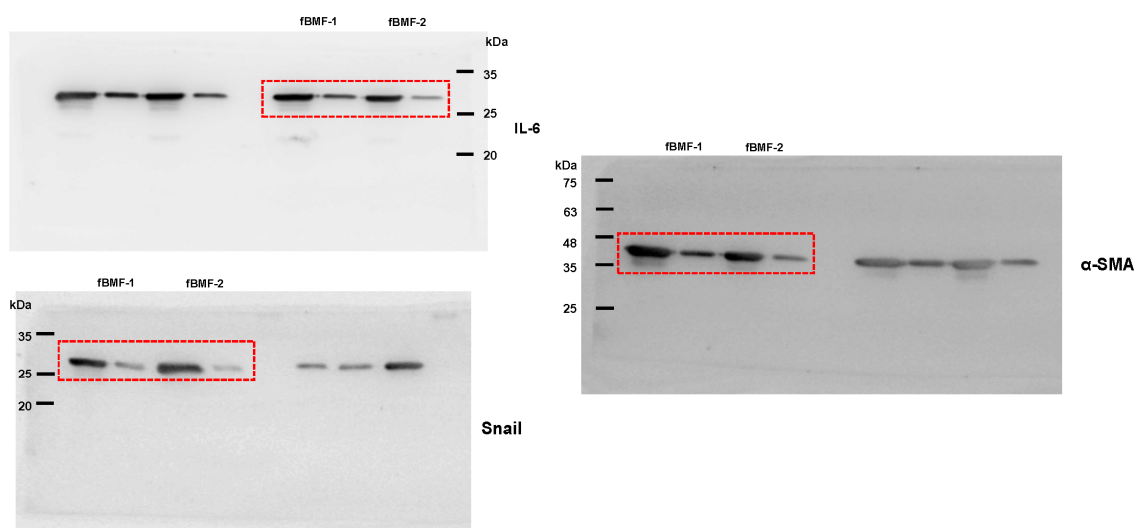

**Figure S12.** Original immunoblotting data for Figure 6A.

Suppl. Fig. 13

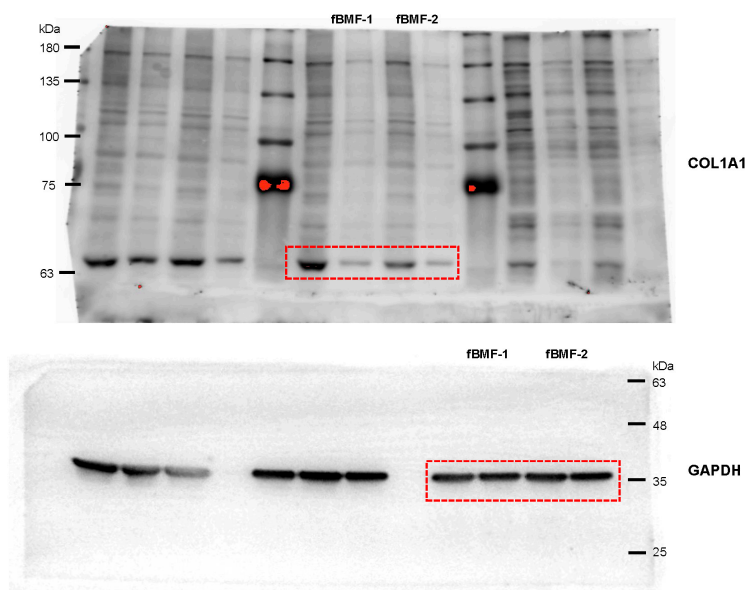

Figure S13. Original immunoblotting data for Figure 6A.

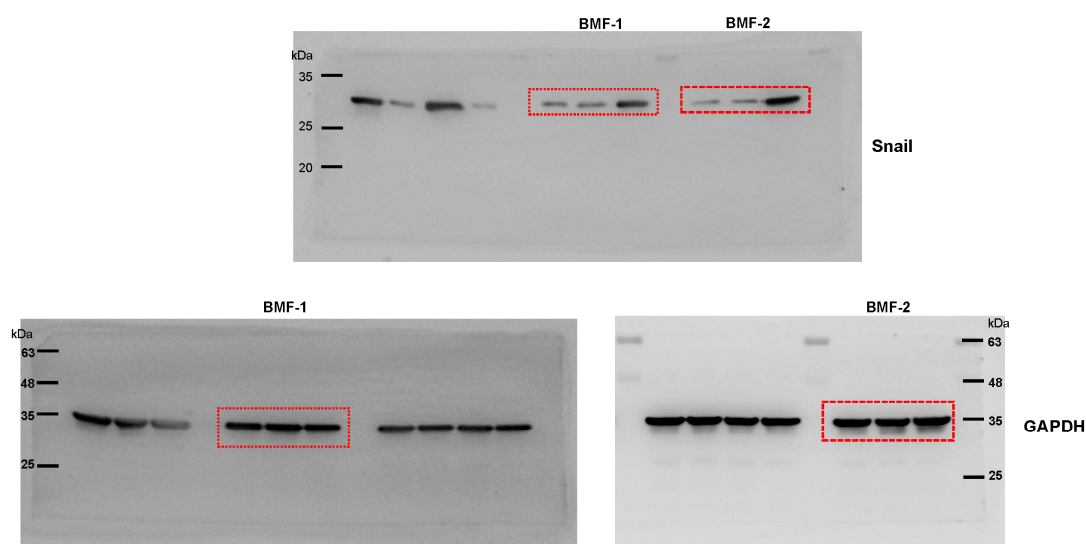

Figure S14. Original immunoblotting data for Figure 6B.

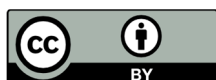

Supplement: s1 [file s1]
